# Supplementary material for: Thermoelectric and photosensitive characteristics of Bridgman grown CuxSb1−xSe2 (x = 0.2, 0.4, 0.6, 0.8) crystals with different Cu/Sb ratios
Source: Royal Society of Chemistry journal article supplement (doi:10.1039/d4ce00677a), 2024-01-01
Supplement: d4ce00677a1.pdf [file d4ce00677a1.pdf]

## Supplementary information

### Thermoelectric and photosensitive characteristics of Bridgman grown $\text{Cu}_x\text{Sb}_{1-x}\text{Se}_2$ ( $x = 0.2, 0.4, 0.6, 0.8$ ) crystals with different Cu/Sb ratios

Zubin R. Parekh <sup>a,\*</sup>, M. P. Deshpande <sup>a,\*</sup>, Sandip V. Bhatt <sup>b</sup>, Rohitkumar M. Kannaujiya <sup>a</sup>,  
Swati J. Pandya <sup>a</sup>, S. H. Chaki <sup>a</sup>

<sup>a</sup>P. G. Department of Physics, Sardar Patel University, Vallabh Vidyanagar, 388120, Gujarat, India.

<sup>b</sup>P. G. Department of Applied & Interdisciplinary Sciences, CISST, Sardar Patel University, Vallabh Vidyanagar, 388120, Gujarat, India.

\*Corresponding author: [zubinparekh1997@gmail.com](mailto:zubinparekh1997@gmail.com)  
[vishwadeshpande@yahoo.co.in](mailto:vishwadeshpande@yahoo.co.in)

#### X-ray diffraction (XRD)

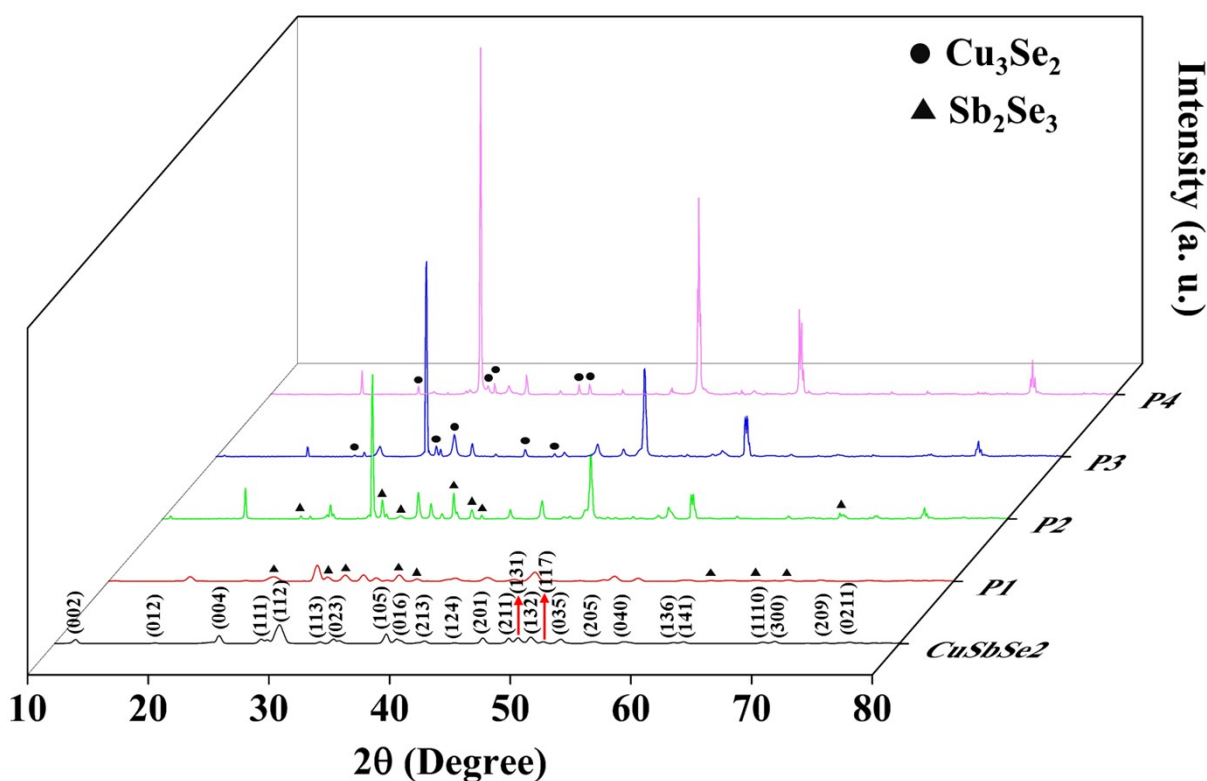

**Figure S1.** The 3D plot of powder XRD pattern of as-grown  $\text{Cu}_x\text{Sb}_{1-x}\text{Se}_2$  ( $x = 0.2, 0.4, 0.6, 0.8$ ) crystals.

## Thermal analysis

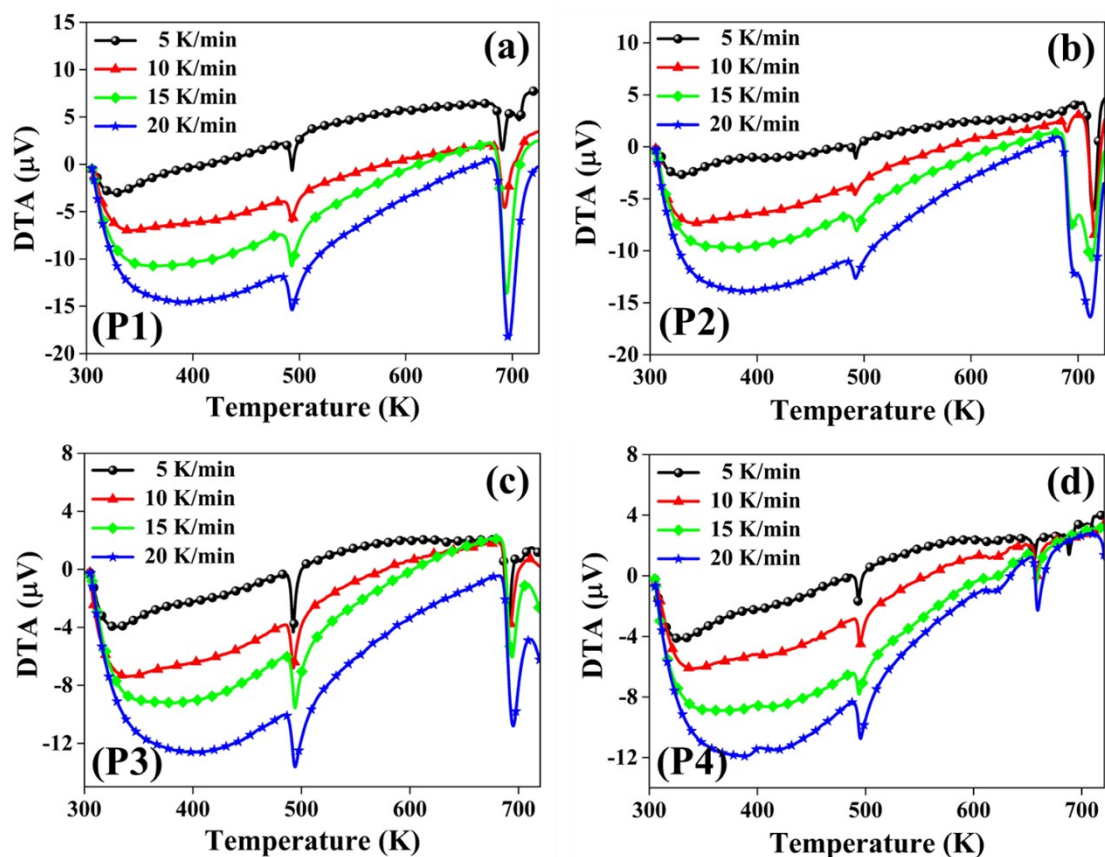

Figure S2. The DTA curves of grown  $\text{Cu}_x\text{Sb}_{1-x}\text{Se}_2$  crystals.

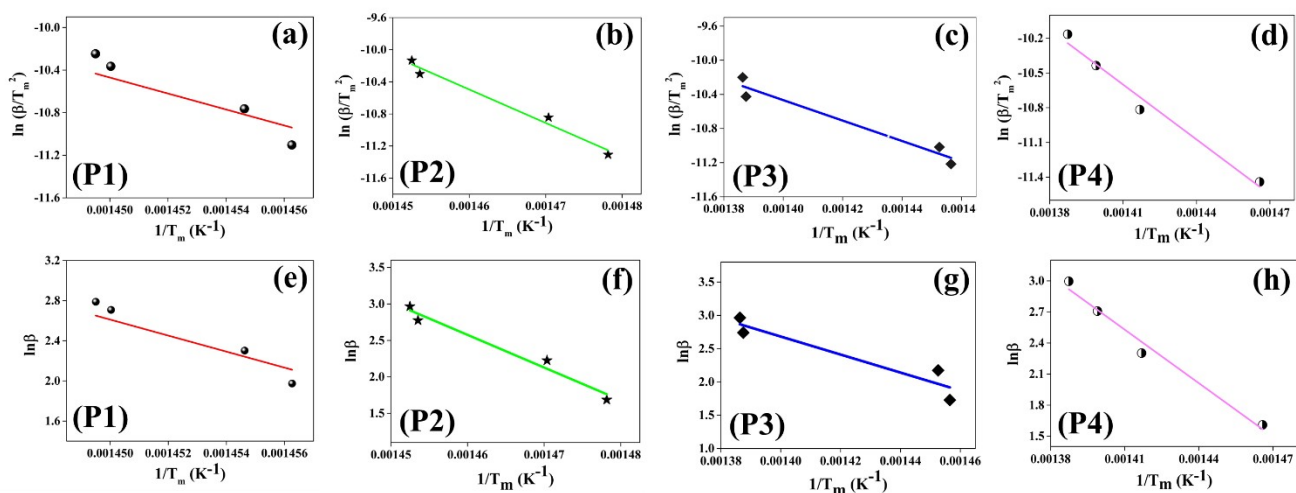

Figure S3. The Kissinger model (a, b, c, d) and FWO model (e, f, g, h) plots of as grown  $\text{Cu}_x\text{Sb}_{1-x}\text{Se}_2$  crystals.

**Table S1.** Detailed information on weight loss corresponding to distinct temperature ranges for  $\text{Cu}_x\text{Sb}_{1-x}\text{Se}_2$  crystals, analysed from TG curves.

| Sample | Heating rate (K/min) | Weight loss (%) (300 K- 725 K) | DTG peak positions $T_m$ (K) |
|--------|----------------------|--------------------------------|------------------------------|
| P1     | 5                    | 9.47                           | 686.69                       |
|        | 10                   | 7.56                           | 687.46                       |
|        | 15                   | 5.01                           | 689.64                       |
|        | 20                   | 3.66                           | 689.89                       |
| Sample | Heating rate (K/min) | Weight loss (%) (300 K- 725 K) | DTG peak position $T_m$ (K)  |
| P2     | 5                    | 7.64                           | 676.51                       |
|        | 10                   | 7.10                           | 680.10                       |
|        | 15                   | 4.25                           | 687.98                       |
|        | 20                   | 3.14                           | 688.48                       |
| Sample | Heating rate (K/min) | Weight loss (%) (300 K- 725 K) | DTG peak position $T_m$ (K)  |
| P3     | 5                    | 12.79                          | 686.59                       |
|        | 10                   | 11.24                          | 688.44                       |
|        | 15                   | 8.88                           | 720.73                       |
|        | 20                   | 6.70                           | 721.32                       |
| Sample | Heating rate (K/min) | Weight loss (%) (300 K- 725 K) | DTG peak position $T_m$ (K)  |
| P4     | 5                    | 18.07                          | 682.21                       |
|        | 10                   | 16.68                          | 705.79                       |
|        | 15                   | 15.86                          | 714.81                       |
|        | 20                   | 8.59                           | 720.79                       |
